# Supplementary material for: A Ni/Fe complex incorporated into a covalent organic framework as a single-site heterogeneous catalyst for efficient oxygen evolution reaction
Source: Royal Society of Chemistry journal article supplement (doi:10.1039/d0qi00620c), 2020-01-01
Supplement: d0qi00620c1.pdf [file d0qi00620c1.pdf]

**Ni/Fe complex incorporated into covalent organic framework as  
single-site heterogeneous catalyst for efficient oxygen evolution  
reaction**

Xuefeng Feng, Zhi Gao\*, Longhui Xiao, Zhenqin Lai, and Feng Luo\*

State key Laboratory of Nuclear Resources and Environment, School of Biology, Chemistry  
and Material Science, East China University of Technology, Nanchang, Jiangxi 330013,  
China

\*Corresponding author

E-mail: gaozhi910201@163.com (Z. Gao); ecitluofeng@163.com (F. Luo)

## EXPERIMENTAL SECTION

### Material Synthesis

2,4,6-triformylphloroglucinol, 2,5-diaminobenzenesulfonic acid, COF-SO<sub>3</sub>H and NH<sub>4</sub>@COF-SO<sub>3</sub> were synthesized according to our previous work [17]. In a typical synthesis of (Cyclen@Ni<sub>x</sub>Fe<sub>1-x</sub>)@COF-SO<sub>3</sub> (x = 0, 0.2, 0.5, 0.8, 1.0), cyclen (18.9 mg), x mL NiCl<sub>2</sub>·6H<sub>2</sub>O (Ni<sup>2+</sup>, 1000 ppm in aqueous solution) and (1-x) mL FeCl<sub>2</sub>·4H<sub>2</sub>O (Fe<sup>2+</sup>, 1000 ppm in aqueous solution) were mixed into 5 mL glass bottle under vigorous stir for 1 h at room temperature to form Cyclen@Ni<sub>x</sub>Fe<sub>1-x</sub> complex. Afterwards, 20 mg of NH<sub>4</sub>@COF-SO<sub>3</sub> powder was put into above solution under continuous stirring for 1 h. Finally, the resulting products was collected by filtration, washed with deionized water to pH = 7.0 and dried in a vacuum oven at 60 °C for 12 h overnight. The final sample was denoted as (Cyclen@Ni<sub>x</sub>Fe<sub>1-x</sub>)@COF-SO<sub>3</sub>. cyclen/NH<sub>4</sub>@COF-SO<sub>3</sub> was prepared by grinding the mixture of cyclen (18.9 mg) and NH<sub>4</sub>@COF-SO<sub>3</sub> (20 mg). 10 mg of (Cyclen@Ni)@COF-SO<sub>3</sub> and 10 mg of (Cyclen@Fe)@COF-SO<sub>3</sub> were mixed uniformly by grinding to obtain (Cyclen@Ni)@COF-SO<sub>3</sub>/(Cyclen@Fe)@COF-SO<sub>3</sub>.

### Electrochemical measurements

All the electrochemical tests were performed in a standard three-electrode system using 1 M KOH aqueous solution as electrolyte at room temperature on a CHI660E electrochemical workstation (CH Instruments Inc., Shanghai). Carbon electrode, saturated calomel electrode and the as-prepared catalyst were served as counter electrode, reference electrode and working electrode, respectively. The area of working electrode immersed into the electrolyte is 1 cm × 1 cm. Before measurement, a mixture of 3 mg sample and 3 mg carbon powder was added to 1 mL solution composed of 0.95 mL ethyl alcohol and 50 μL Nafion solutions under ultrasonication for 30 min to obtain a homogeneous catalyst ink. Finally, 50 μL of above ink was loaded on the carbon paper and then dried at room temperature. All the potentials were

referenced to a reversible hydrogen electrode (RHE). The linear sweep voltammetry (LSV) was recorded in an O<sub>2</sub>-saturated 1.0 M KOH at a scan rate of 5 mV s<sup>-1</sup>. Electrochemical impedance spectroscopy (EIS) measurements of (Cyclen@Ni<sub>x</sub>Fe<sub>1-x</sub>)@COF-SO<sub>3</sub> (x = 0, 0.2, 0.5, 0.8, 1.0) were carried out over a frequency range from 100 kHz to 0.1 Hz at the overpotential of 308 mV. The electrochemically active surface area (ECSA) of different catalysts was determined based on the double-layer capacitance (C<sub>dl</sub>) using a simple cyclic voltammetry method in a non-Faradic potential range of 1.23-1.33 V vs RHE. By plotting the capacitive density at 1.28 V vs RHE against the scan rate, a linear trend was observed. The slope of the fitted line was the twice of C<sub>dl</sub>. Turnover frequency (TOF) value of catalysts was calculated based on the equation:  $TOF = (J \times A) / (4 \times F \times n)$ , where  $J$  (mA/cm<sup>2</sup>) is the current density at an overpotential of 300 mV;  $A$  is the surface area of electrode (1 cm<sup>2</sup>);  $F$  is the Faraday constant (96485 C/mol);  $n$  is molar number of active sites on the electrode. Both Ni and Fe in (Cyclen@Ni<sub>x</sub>Fe<sub>1-x</sub>)@COF-SO<sub>3</sub> (x = 0, 0.2, 0.5, 0.8, 1.0) (x = 0, 0.2, 0.5, 0.8, 1) samples are regarded as active sites. The Faradaic efficiency was determined by comparing the experimentally produced gas volume with the theoretically calculated one by the equation of Faradaic efficiency =  $V_{experimental} / V_{theoretical}$ . The experiment volume of O<sub>2</sub> ( $V_{experimental}$ ) was obtained by experimental data and the theoretical volume of O<sub>2</sub> ( $V_{theoretical}$ ) can be calculated by the formula of  $V_{theoretical} = J \cdot t \cdot V_m / n \cdot F$ , where  $J$  is the current density;  $t$  is the measured time;  $V_m$  is the molar volume of O<sub>2</sub> in 1/mol;  $n$  is the number of electrons required for one molecule O<sub>2</sub> and  $F$  is the Faraday constant (96485 C/mol).

### Characterizations

The samples were tested by X-ray diffraction (XRD) on a Bruker AXSD8 Discover powder diffractometer with Cu K $\alpha$  radiation ( $\lambda = 0.154$  nm). Mercury 1.4 was used to determine the simulated powder patterns. Infrared spectra (IR) of samples were investigated on a Bruker VERTEX70 spectrometer. Low temperature N<sub>2</sub> adsorption-desorption isotherms were recorded on a Belsorp-max. SEM images were obtained on a Hitachi S-4800 microscope. X-

ray photoelectron spectra (XPS) spectra were collected by Thermo Scientific ESCALAB 250 Xi spectrometer. Transmission electron microscopy (TEM) was taken using a JEOL 2100 microscope operated at an accelerating voltage of 200 kV. Metal content in samples was determined by a Shimadzu ICPS-7500 inductively coupled plasma emission spectrometer (ICP-AES).

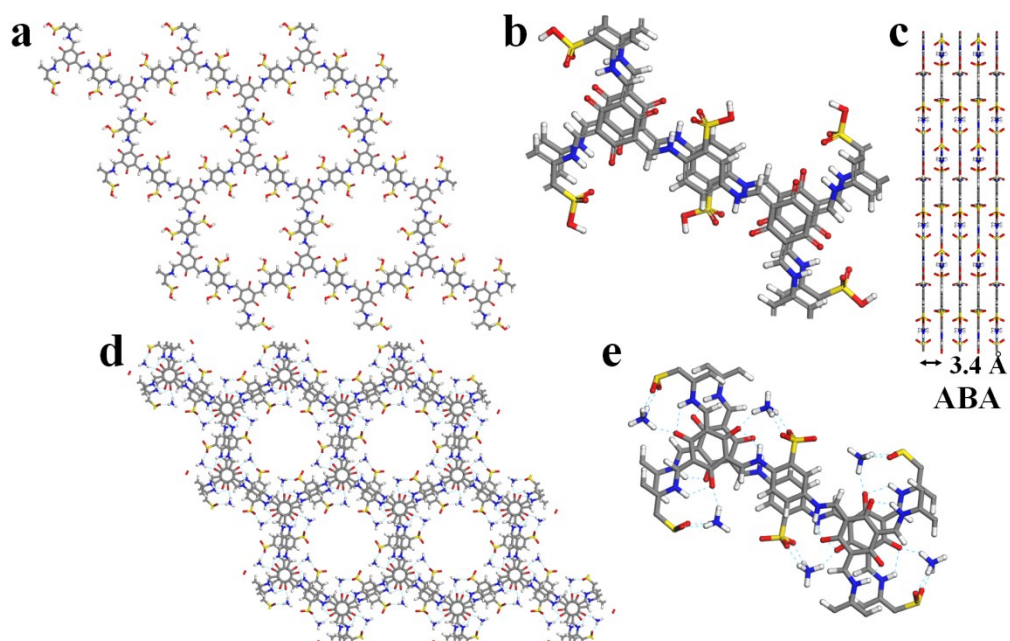

**Figure S1** The structure of COF-SO<sub>3</sub>H (a-c) and NH<sub>4</sub>@COF-SO<sub>3</sub>H (d, e).

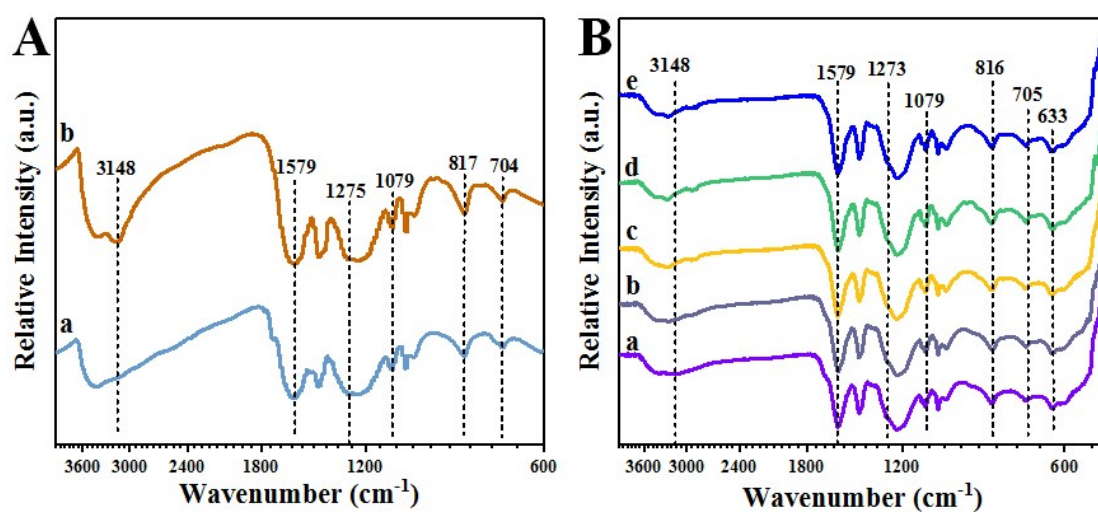

**Figure S2** A) IR spectrum of COF-SO<sub>3</sub>H (a) and NH<sub>4</sub>@COF-SO<sub>3</sub> (b). B) IR spectrum of (Cyclen@Fe)@COF-SO<sub>3</sub> (a), (Cyclen@Ni<sub>0.2</sub>Fe<sub>0.8</sub>)@COF-SO<sub>3</sub> (b), (Cyclen@Ni<sub>0.8</sub>Fe<sub>0.2</sub>)@COF-SO<sub>3</sub> (c), (Cyclen@Ni)@COF-SO<sub>3</sub> (d) and (Cyclen@Ni<sub>0.5</sub>Fe<sub>0.5</sub>)@COF-SO<sub>3</sub> (e).

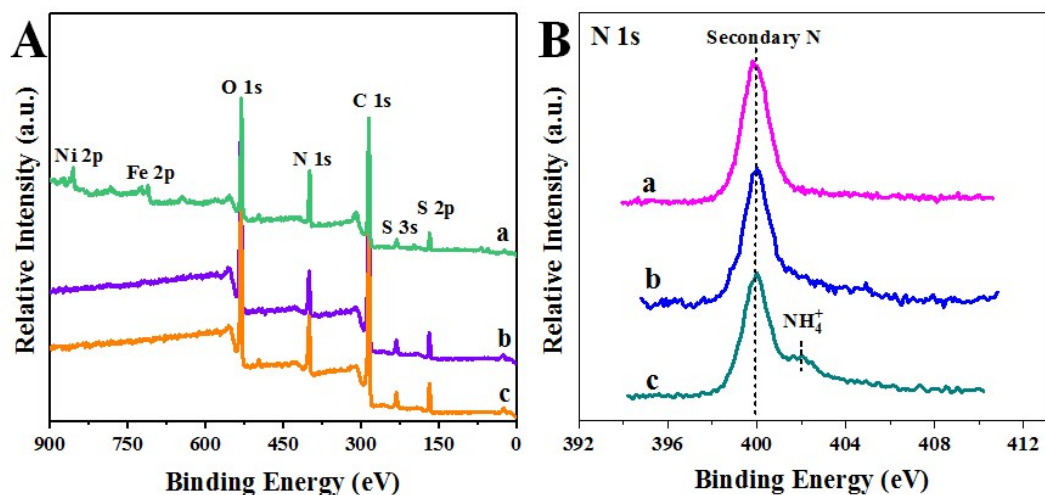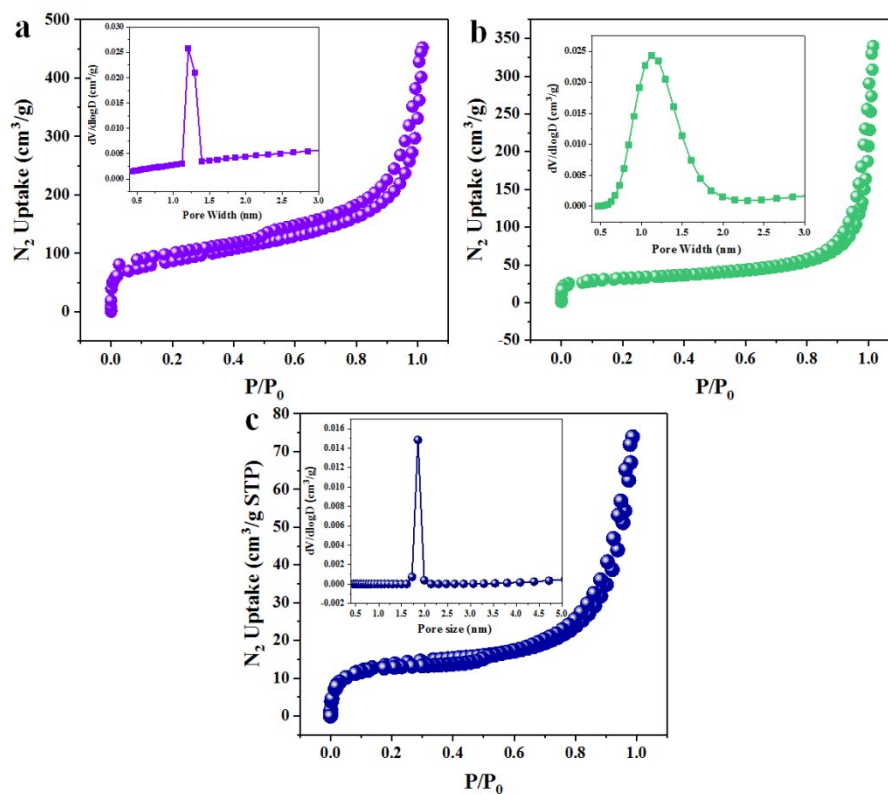

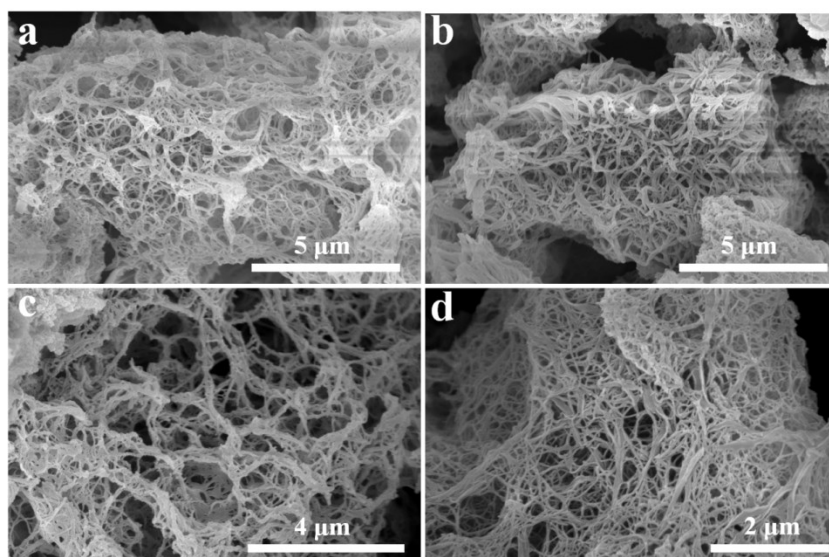

**Figure S5** SEM images of (Cyclen@Ni)@COF-SO<sub>3</sub> (a), (Cyclen@Ni<sub>0.2</sub>Fe<sub>0.8</sub>)@COF-SO<sub>3</sub> (b), (Cyclen@Ni<sub>0.8</sub>Fe<sub>0.2</sub>)@COF-SO<sub>3</sub> (c) and (Cyclen@Fe)@COF-SO<sub>3</sub> (d).

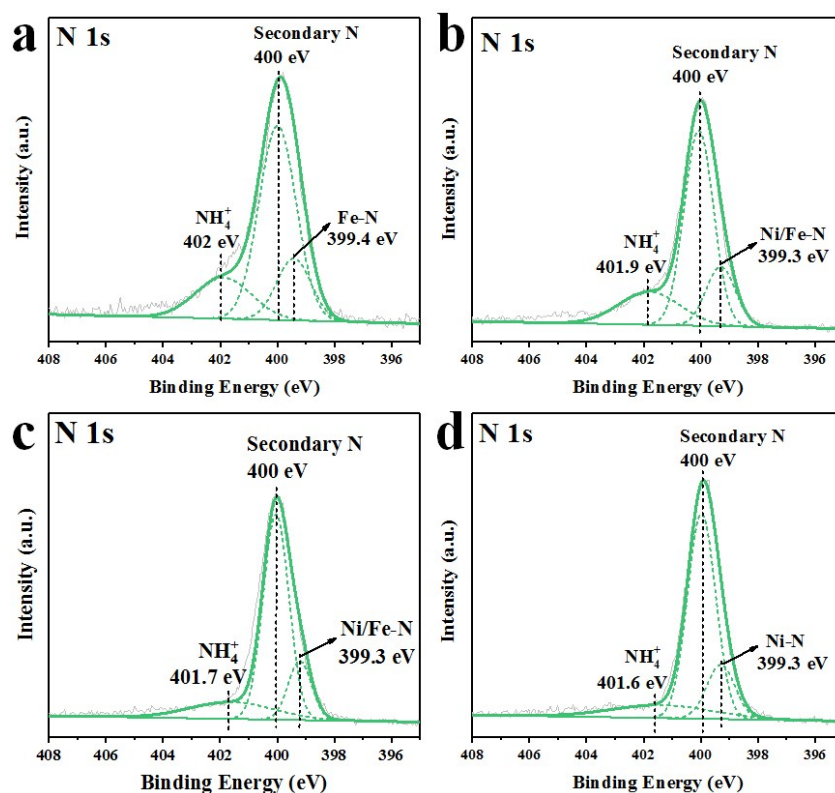

**Figure S6** XPS spectra of high-resolution N 1s region in (Cyclen@Fe)@COF-SO<sub>3</sub> (a), (Cyclen@Ni<sub>0.2</sub>Fe<sub>0.8</sub>)@COF-SO<sub>3</sub> (b), (Cyclen@Ni<sub>0.8</sub>Fe<sub>0.2</sub>)@COF-SO<sub>3</sub> (c) and (Cyclen@Ni)@COF-SO<sub>3</sub> (d).



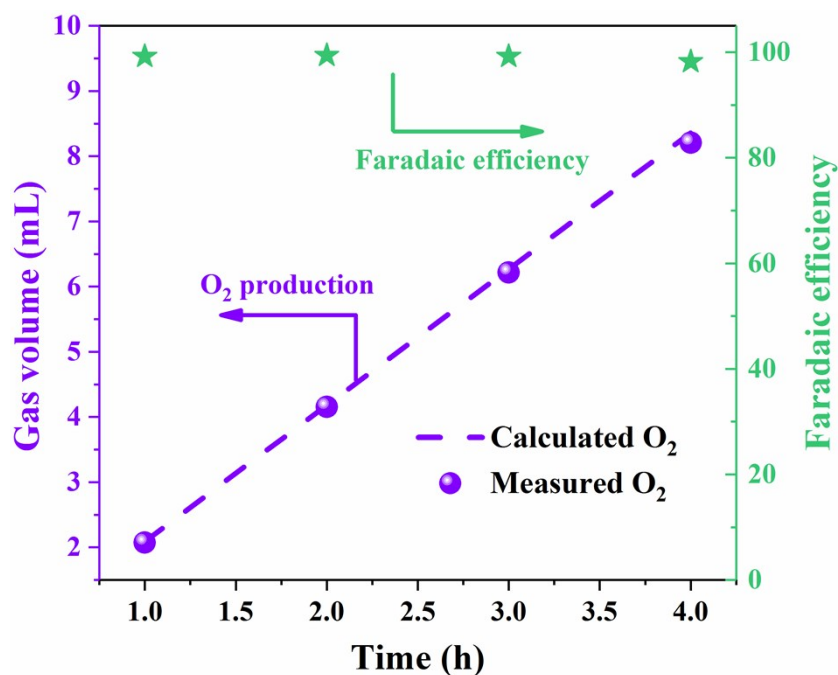

**Figure S7** Faradaic efficiency of (Cyclen@Ni<sub>0.5</sub>Fe<sub>0.5</sub>)@COF-SO<sub>3</sub> for oxygen production.

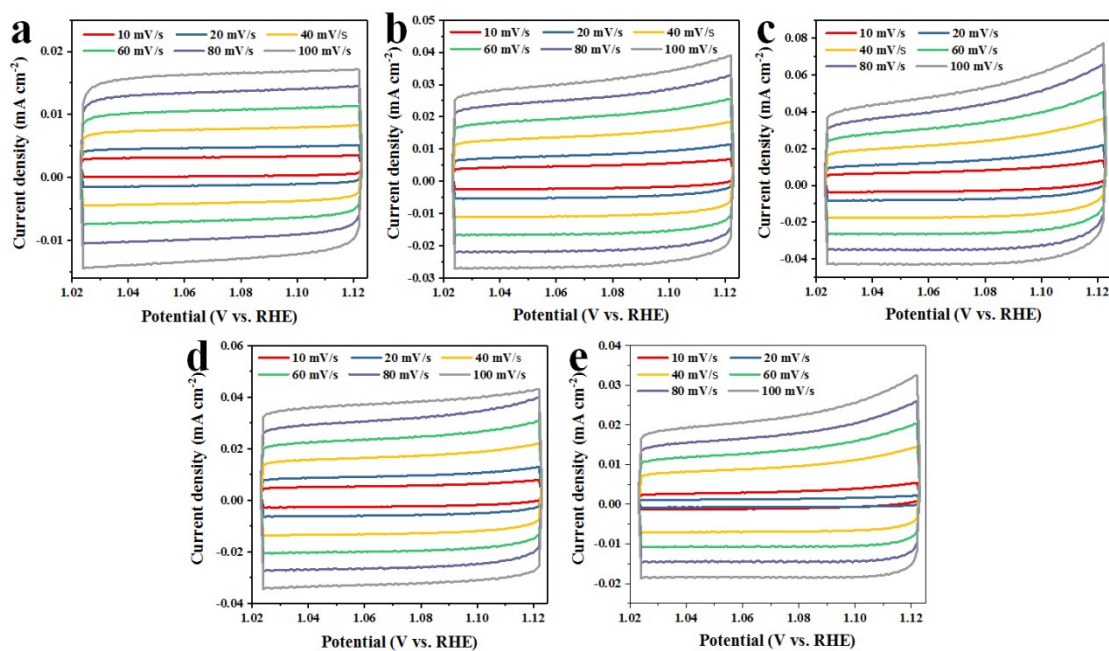

**Figure S8** CV plots of (Cyclen@Fe)@COF-SO<sub>3</sub> (a), (Cyclen@Ni<sub>0.2</sub>Fe<sub>0.8</sub>)@COF-SO<sub>3</sub> (b), (Cyclen@Ni<sub>0.5</sub>Fe<sub>0.5</sub>)@COF-SO<sub>3</sub> (c), (Cyclen@Ni<sub>0.8</sub>Fe<sub>0.2</sub>)@COF-SO<sub>3</sub> (d) and (Cyclen@Ni)@COF-SO<sub>3</sub> (e) tested at various scan rates from 10 to 100 mV s<sup>-1</sup>.



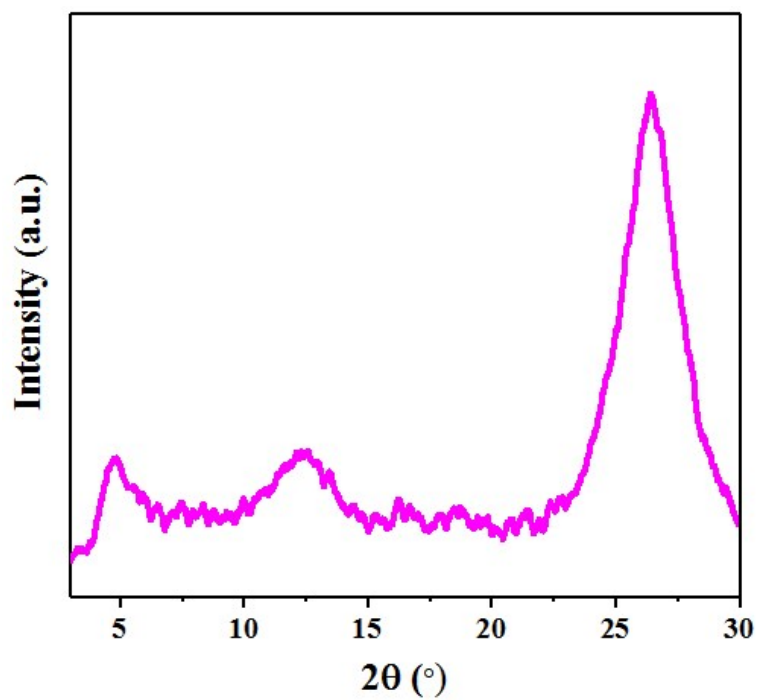

**Figure S9** PXRD image of (Cyclen@Ni<sub>0.5</sub>Fe<sub>0.5</sub>)@COF-SO<sub>3</sub> after chronoamperometric measurement.

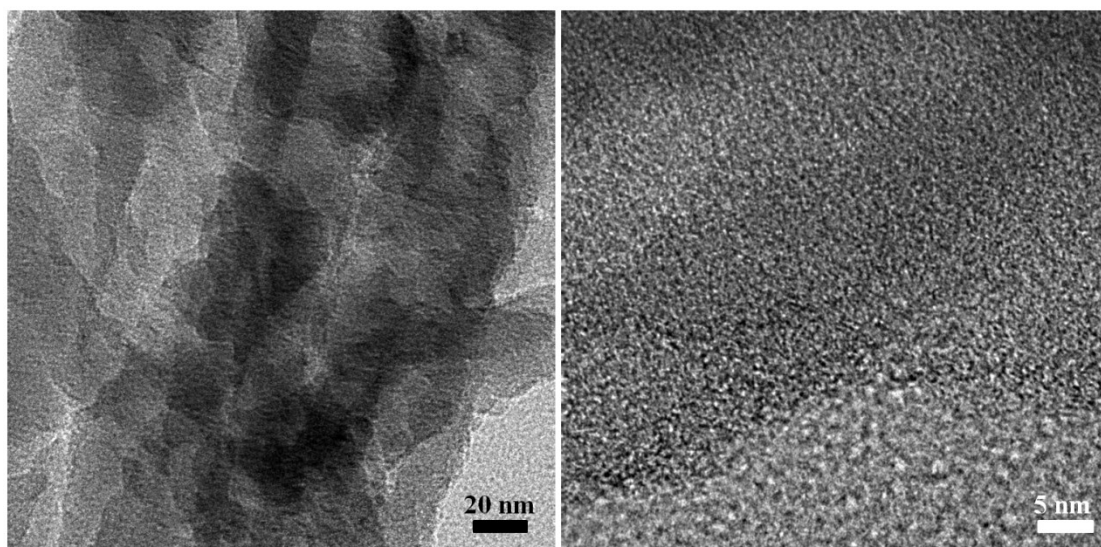

**Figure S10** TEM and HRTEM image of (Cyclen@Ni<sub>0.5</sub>Fe<sub>0.5</sub>)@COF-SO<sub>3</sub> after chronoamperometric measurement.

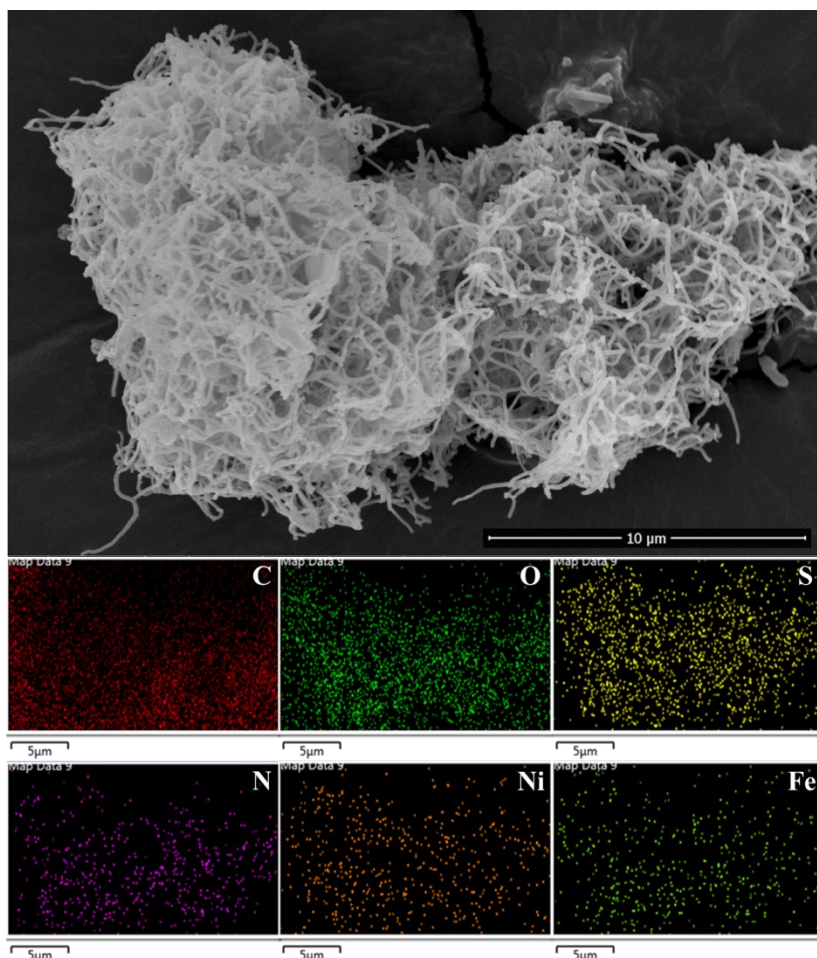

**Figure S11** SEM image and SEM-EDS mapping of (Cyclen@Ni<sub>0.5</sub>Fe<sub>0.5</sub>)@COF-SO<sub>3</sub> after OER stability test.

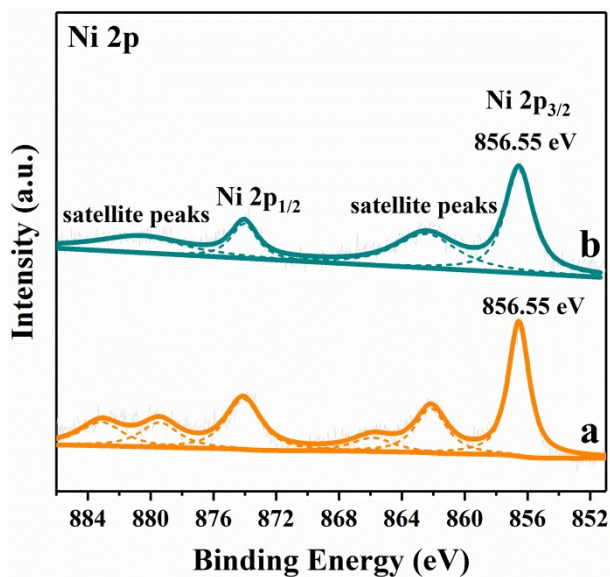

**Figure S12** XPS spectra in the fine Ni 2p region for (Cyclen@Ni<sub>0.5</sub>Fe<sub>0.5</sub>)@COF-SO<sub>3</sub> before (a) and after OER stability test (b).

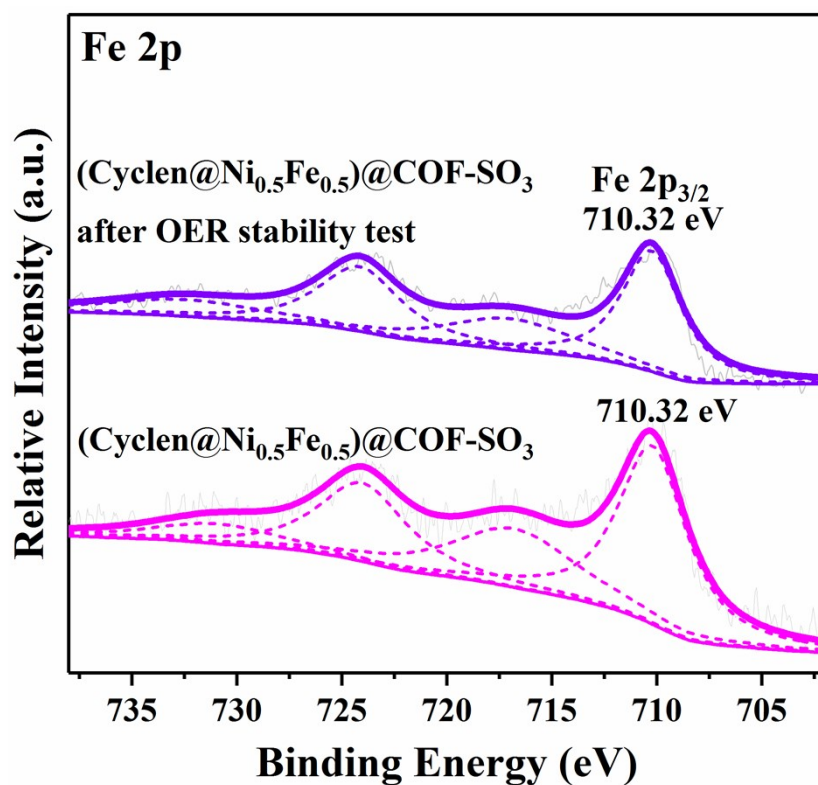

**Figure S13** XPS spectra in the fine Fe 2p region for (Cyclen@Ni<sub>0.5</sub>Fe<sub>0.5</sub>)@COF-SO<sub>3</sub> before and after OER stability test.

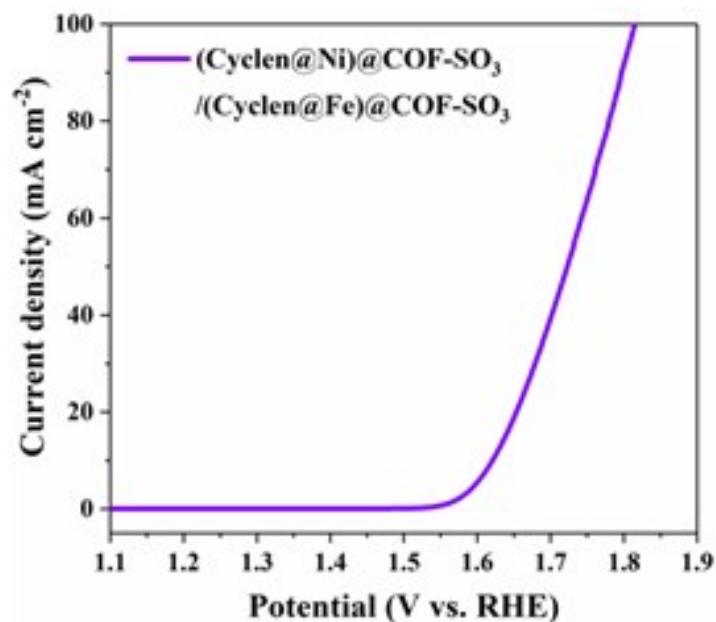

**Figure S14** LSV curve of the mechanical mixture of (Cyclen@Ni)@COF-SO<sub>3</sub>/(Cyclen@Fe)@COF-SO<sub>3</sub>.

**Table S1** ICP-AES results of different COFs.

| Catalyst                                                          | Content (wt.%) |      | Ni/Fe mass ratio |
|-------------------------------------------------------------------|----------------|------|------------------|
|                                                                   | Ni             | Fe   |                  |
| (Cyclen@Ni)@COF-SO <sub>3</sub>                                   | 4.97           | 0    | 4.97/0           |
| (Cyclen@Fe)@COF-SO <sub>3</sub>                                   | 0              | 5.12 | 0/5.12           |
| (Cyclen@Ni <sub>0.2</sub> Fe <sub>0.8</sub> )@COF-SO <sub>3</sub> | 1.03           | 4.32 | 0.2/0.84         |
| (Cyclen@Ni <sub>0.5</sub> Fe <sub>0.5</sub> )@COF-SO <sub>3</sub> | 2.53           | 2.47 | 0.5/0.49         |
| (Cyclen@Ni <sub>0.8</sub> Fe <sub>0.2</sub> )@COF-SO <sub>3</sub> | 4.14           | 1.06 | 0.8/0.21         |

**Table S2.** Comparison of the OER activities of recently reported highly active catalysts in 1.0 KOH.

| Catalysts                                       | Overpotential at 10 mA cm <sup>-2</sup> (mV vs. RHE) | Tafel slope (mV dec <sup>-1</sup> ) | Mass loading (mg cm <sup>-2</sup> ) | Substrate | TOF (10 <sup>-2</sup> s <sup>-1</sup> ) at overpotential of 300 mV | Reference                                                    |
|-------------------------------------------------|------------------------------------------------------|-------------------------------------|-------------------------------------|-----------|--------------------------------------------------------------------|--------------------------------------------------------------|
| (Cyclen@Ni <sub>0.5</sub> Fe <sub>0.5</sub> )@C | 276                                                  | 43                                  | 0.15                                | carbon    | 69                                                                 | <a href="#">This work</a>                                    |
| OF-SO <sub>3</sub>                              |                                                      |                                     |                                     | cloth     |                                                                    | <i>Adv. Energy Mater.</i>                                    |
| Fe <sub>3</sub> Co <sub>7</sub> -B/CNT          | 265                                                  | 30                                  | 0.3                                 | GC        | 43                                                                 | <b>2019</b> , 9, 1901503                                     |
| Fe <sub>1</sub> Ni <sub>2</sub> -BDC            | 260                                                  | 35                                  | 0.255                               | GC        | 36@330 mV                                                          | <i>ACS Energy Lett.</i> <b>2019</b> , 4, 285–292             |
| MIL-53(FeNi)/NF                                 | 233<br>at 50 mA cm <sup>-2</sup>                     | 31.4                                | 2.63                                | Ni foam   | 40@252 mV                                                          | <i>Adv. Energy Mater.</i><br><b>2018</b> , 8, 1800584        |
| MAF-X27-OH                                      | 303                                                  | 83                                  | 0.21                                | Cu Foil   | 1.9                                                                | <i>J. Am. Chem. Soc.</i><br><b>2016</b> , 138, 8336.         |
| CoO <sub>x</sub> -ZIF                           | 318                                                  | 70.3                                | 0.04                                | GC        | 8.2@320 mV                                                         | <i>Adv. Funct. Mater.</i><br><b>2017</b> , 27, 1702546       |
| CTGU-10c2                                       | 240                                                  | 58                                  | 0.14                                | GC        | 5.378@240 mV                                                       | <i>Angew. Chem. Int. Ed.</i><br><b>2019</b> , 58, 4227-4231. |
| 0.1 KOH                                         |                                                      |                                     |                                     | Carbon    |                                                                    | <i>Angew. Chem. Int. Ed.</i>                                 |
| NNU-23                                          | 376                                                  | 77.2                                | 1                                   | Carbon    | 3@400 mV                                                           | <b>2018</b> , 57, 9660.                                      |
| 0.1 KOH                                         |                                                      |                                     |                                     | cloth     |                                                                    | <i>Nat. Energy</i> <b>2016</b> , 1, 16184.                   |
| NiCo-UMOFNs                                     | 250                                                  | 42                                  | 0.2                                 | GC        | 86                                                                 | <i>ACS Nano</i> <b>2015</b> , 9, 1977.                       |
| NiFeLDH/GO                                      | 210                                                  | 42                                  | 0.25                                | GC        | 10                                                                 | <i>Science</i> <b>2016</b> , 352, 333.                       |
| G-FeCoW                                         | 217 (±2)                                             | 37 (±2)                             | 0.21                                | GC        | 46(±8)                                                             | <i>Nat. Commun.</i> <b>2014</b> , 5, 4477.                   |
| LDHNiFe                                         | 300                                                  | 40                                  | 0.07                                | GC        | 7                                                                  | <i>J. Am. Chem. Soc.</i><br><b>2014</b> , 136, 16481.        |
| CoMn LDH                                        | 324                                                  | 43                                  | 0.142                               | GC        | 7.5                                                                | <i>J. Am. Chem. Soc.</i><br><b>2017</b> , 139, 1778.         |
| Fe <sub>3</sub> -Co <sub>2</sub>                | 225                                                  | 48                                  | 0.2                                 | Ni foam   | 182                                                                |                                                              |
| 0.1 M KOH                                       |                                                      |                                     |                                     |           |                                                                    |                                                              |
